# Supplementary material
Source: Research Square preprint supplement (doi:10.21203/rs.3.rs-9996037/v1)
Supplement: Supplementary file 1 [file 3a6b14d0406a6d3256864d3d.docx]

**SUPPLEMENTARY FILES**


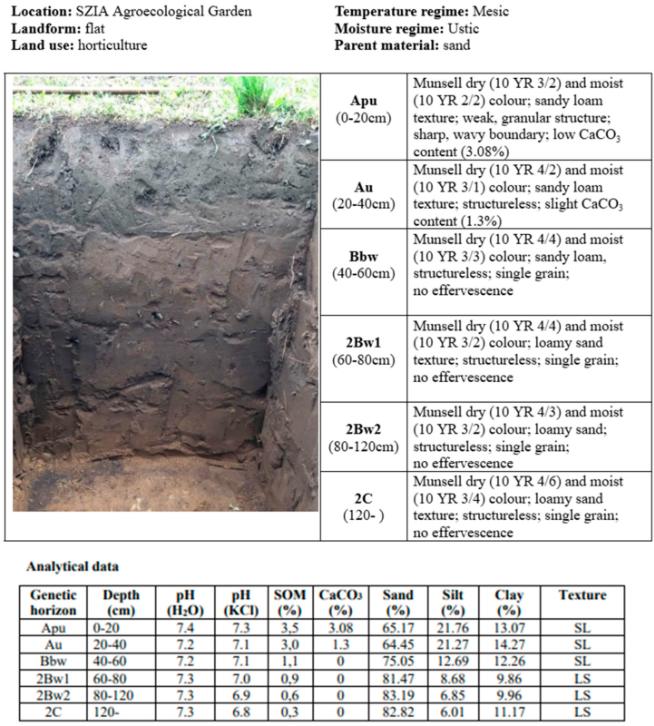


*Figure A1: Description and profile of the soil horizons at the experimental site, (Source: MATE Soil Research Team)*

| Lab. Registration Number | Test Parameter | Test Method | Measurement Uncertainty (±R%) |
| --- | --- | --- | --- |
| 254207-254218 | pH(H2O),    pH(KCl)* | MSZ-08-0206-2:1978 2.1. section | ±0.2 pH |
| Soil plasticity according to Arany | MSZ-08-0205:1978 5.1. section | ± 3 KA |
| Organic matter | MSZ-08-0452:1980 2.2. section, 2.3. section, 3.1.2. section | 10 |
| CaCO3 | MSZ-08-0206-2:1978 2.2. section | 10 |
| All water-soluble salts | MSZ-08-0206-2:1978 2.4. section | 10 |
| P2O5 (AL) | MSZ 20135:1999 5.1. section | 10 |
| K2O (AL) | MSZ 20135:1999 5.1. section | 10 |
| (NO2- + NO3-) - N  (KCl) | MSZ 20135:1999 5.4.3. section | 10 |
| Na (AL) | MSZ 20135:1999 5.1. section | 10 |
| Cu (EDTA) | MSZ 20135:1999 5.1. section | 10 |
| Mn (EDTA) | MSZ 20135:1999 5.1. section | 10 |
| Zn (EDTA) | MSZ 20135:1999 5.1. section | 10 |
| Mg (KCl) | MSZ 20135:1999 5.1. section | 10 |
| SO42-(KCl) | MSZ 20135:1999 5.1. section | 10 |

*Table A1: Methods of analysis for soil samples, (Source: Provided by the university laboratory)*

| **Lab. Registration Number** | **Test Parameter** | **Test Method** |
| --- | --- | --- |
| 254219-254222 | Moisture content | MSZ ISO 6496:2001 |
| Phosphorus content | MSZ-08-1783-28:1985 |
| Calcium content | MSZ-08-1783-26:1985 |
| Potassium content | MSZ-08-1783-29:1985 |
| Magnesium content | MSZ-08-1783-27:1985 |
| Iron content | MSZ-08-1783-31:1985 |

*Table A2: Methods of analysis for lettuce samples, (Source: Provided by the university laboratory)*
